# Supplementary material for: Norwegian General Practitioners’ Perspectives on Implementation of a Guided Web-Based Cognitive Behavioral Therapy for Depression: A Qualitative Study
Source: PubMed Central journal article supplement (PMC4180343; doi:10.2196/jmir.3556), 2014-09-10
Supplement: jmir_v16i9e208_app1.pdf [file jmir_v16i9e208_app1.pdf]

## Interview guide

- date and place
- age and experience from general practice

### General perceptions

- Tell a little bit about your experience with depressed patients and their treatment.
- How do you experience having a depressed patient in your office?
- In what way do you approach this patient?
- Tell about the last depressed person you had in your office (including contact, actions...)

### Motivation

- What made you take the course in CBT? How did you hear about MoodGYM?
- Describe how you have tried to conduct treatment.
- If anything, what motivated you as a doctor using techniques of CBT or MoodGYM?
- What elements of treatment do you think are most important? How does this affect treatment progress?
- What difficulties have you experienced and how did you solve them?
  - Did the patients want to try this?
  - Did the patients do the modules at home?
  - Were there any technical challenges?
  - Was there enough time in the consultation?
  - How does it fit in a normal consultation? Tell more!
- What is necessary for you to prioritize to obtain knowledge/experience about MoodGYM?
- What is necessary for you to feel well prepared to use MoodGYM?

### Treatment

- What do you think about using CBT or MoodGYM?
- How did you as a doctor perceive using MoodGYM?
- Who do you think can be a candidate for this treatment? (What is it about the patient that makes him suitable or not?)
- Approximately how many patients have you tried this on?
- Tell about a situation you remember well from this time you have tried to use MoodGYM in your treatment. Why this episode?
- Did you have to do any practical changes in consultations to enable treatment? (Time, follow-ups, other?)
- Did you do any preparation before using MoodGYM?
- Did you experience changes in the contact/bond with the patient? Tell about the last one.
- Did you experience you could influence the approach? In what way?
- Did you make any adjustments to the approach to accommodate how you preferred to meet your patients?
- Can you tell what you valued from this way of providing treatment?

- If you were to recommend this to a colleague what would you emphasize?
- With the experiences you have made, if you had the opportunity to improve MoodGYM what would you change, take away or add?
- What other treatment alternatives did you consider?

### **Quality and interaction.**

- Has this course based on CBT resulted in a change treatment for your patients? Describe.
- Has your use of MoodGYM changed the way you give treatment?
- How do you perceive your cooperation with the specialized service after you have taken this course?
- Did you change how you interact with specialized service after you implemented MoodGYM? How?
- Would you like to take another course based on CBT and perhaps learn more about MoodGYM or another self-help program? Elaborate.

### **Final questions**

- Would you like to add anything?
- Anything I haven't asked, that you would like to elaborate?

**Thank you!**
